# Supplementary material for: A Novel Flow Cytometry-Based Assay for the Identification of HCN4 CNBD Ligands
Source: MDPI journal article supplement (doi:10.3390/ph16050710), 2023-05-07
Supplement: s1 [file s1]

Supporting Information for

# A Novel Flow Cytometry-Based Assay for the Identification of HCN4 CNBD Ligands

Magdalena N. Wojciechowski, Sebastian Schreiber and Joachim Jose \*

University of Münster, Institute of Pharmaceutical and Medicinal Chemistry,  
Pharmacampus, 48149 Münster, Germany

\* Correspondence: joachim.jose@uni-muenster.de

## Table of contents:

**Figure S1:** Prove of HCN4 C-Linker-CNBD surface display *via* immunolabeling and flow cytometry.

**Figure S2:** Analysis of equilibrium conditions and ligand depletion

**Figure S3:** Structure of 7-CH-cAMP, competitive binding assay with 8-Fluo-cAMP and 7-CH-cAMP.

**Table S1:** Benzimidazole-derivatives tested for 8-Fluo-cAMP displacement

**Table S2:** Indenoindole- and indenoindole-dione- derivatives tested for 8-Fluo-cAMP displacement

**Table S3:** Phenoxazine- and Phenothiazine- derivatives tested for 8-Fluo-cAMP displacement

**Table S4:** Acridine- derivatives tested for 8-Fluo-cAMP displacement

**Table S5:** Naphthofurane- and Naphthothiophene- derivatives tested for 8-Fluo-cAMP displacement

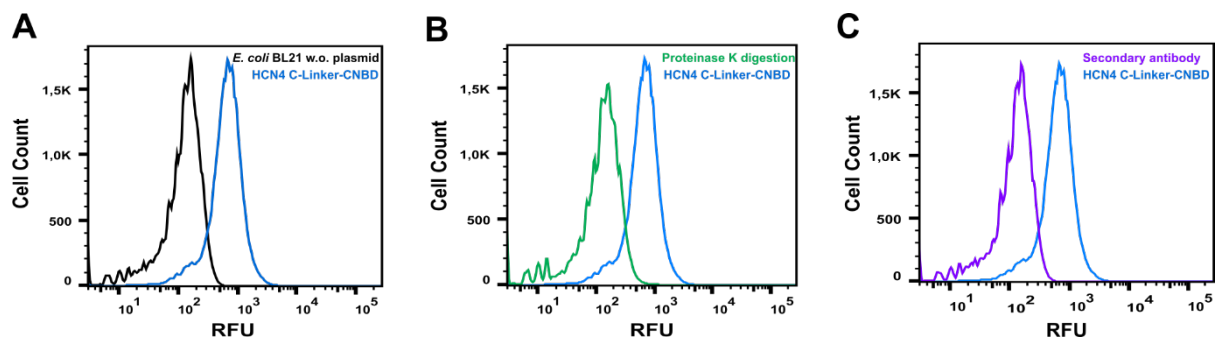

**Figure S1.** Prove of HCN4 C-Linker-CNBD surface display *via* immunolabeling and flow cytometry. (A) Histogram of *E. coli* BL21 cell without plasmid (black) and *E. coli* BL21 cells displaying the HCN4 C-Linker-CNBD (blue) treated with primary anti Myc-tag antibody and secondary antibody conjugated to the DyLight™633 fluorophore. (B) Immunolabeling histogram of cells displaying the HCN4 C-Linker-CNBD before (blue) and after Proteinase K digestion (green). (C) Histogram of cells presenting the HCN4 C-Linker-CNBD labelled with secondary antibody only (purple) or primary and secondary antibody (blue).

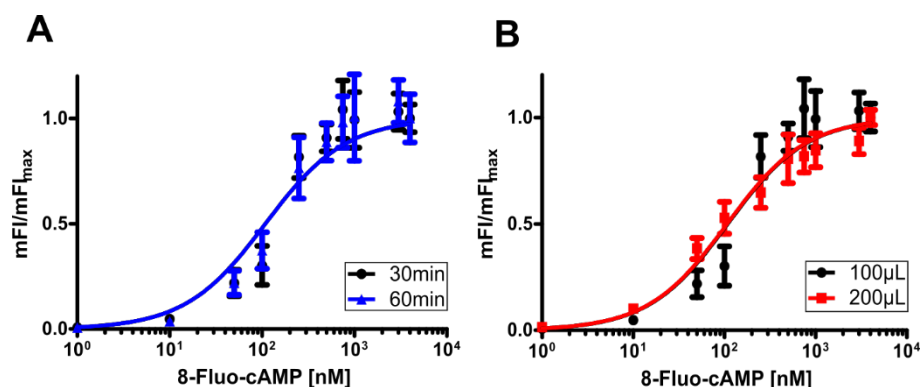

**Figure S2.** Analysis of equilibrium conditions and ligand depletion. (A) Comparison of the ligand binding curves obtained after 30min (black) and 60min (blue) incubation time. (B) Comparison of the ligand binding curves after variation of the sample volume 100µL (black) and 200µL (red).

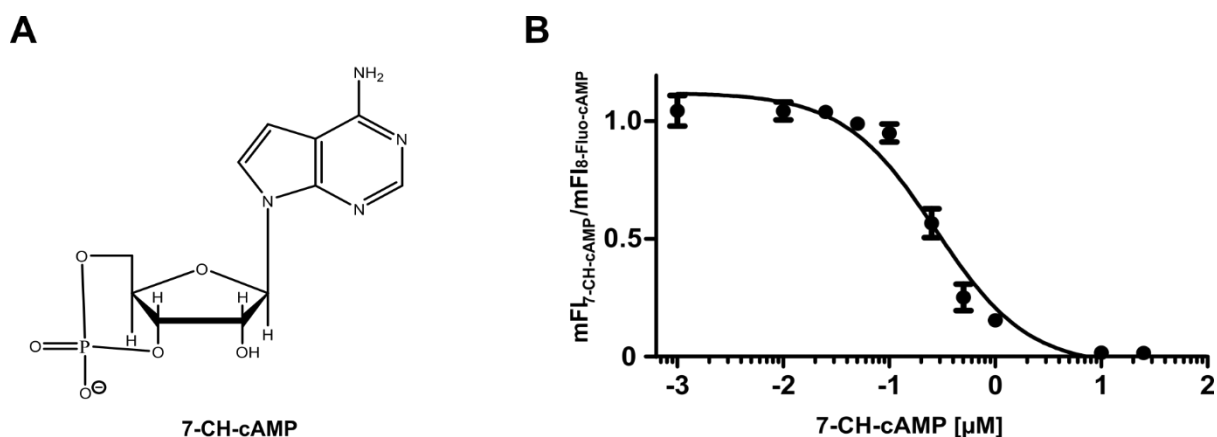

**Figure S3.** Competitive binding assay with 8-Fluo-cAMP and 7-CH-cAMP. (A) Structure of 7-CH-cAMP. (B) Displacement binding curve obtained for 7-CH-cAMP ranging from 1nM-25μM and a fixed concentration of 8-Fluo-cAMP at 50nM. Mean fluorescence measured for each 7-CH-cAMP concentration ( $mFI_{7-CH-cAMP}$ ) was normalized to mean fluorescence for 50nM 8-Fluo-cAMP only ( $mFI_{8-Fluo-cAMP}$ ) and plotted against competitor concentration.

**Table S1.** Benzimidazole-derivatives tested for 8-Fluo-cAMP displacement

| Name | R <sup>1</sup> | R <sup>2</sup>                                   | R <sup>3</sup>      |
|------|----------------|--------------------------------------------------|---------------------|
| 1    | H              | CH <sub>2</sub> -( <i>p</i> -OMe)Ph              | H                   |
| 2    | H              | ( <i>p</i> -Cl)Ph                                | CH <sub>2</sub> -OH |
| 3    | H              | Ph                                               | CH <sub>2</sub> -OH |
| 4    | Ph             | (2,6-Cl)Ph                                       | H                   |
| 5    | H              | ( <i>p</i> -Me)Ph                                | CH <sub>2</sub> -OH |
| 6    | H              | ( <i>p</i> -N(CH <sub>3</sub> ) <sub>2</sub> )Ph | CH <sub>2</sub> -OH |

**Table S2.** Indenoindole- derivatives tested for 8-Fluo-cAMP displacement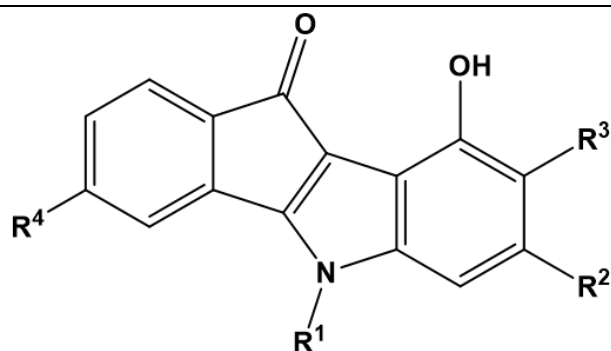

| Name | R <sup>1</sup>                                       | R <sup>2</sup> | R <sup>3</sup> | R <sup>4</sup>                          |
|------|------------------------------------------------------|----------------|----------------|-----------------------------------------|
| 7    | CH(Me) <sub>2</sub>                                  | 2-furan        | H              | H                                       |
| 8    | CH(Me) <sub>2</sub>                                  | H              | H              | H                                       |
| 9    | CH <sub>2</sub> -Ph                                  | H              | H              | H                                       |
| 10   | CH(Me) <sub>2</sub>                                  | COOMe          | H              | H                                       |
| 11   | CH(Me) <sub>2</sub>                                  | COOH           | H              | H                                       |
| 12   | CH(Me) <sub>2</sub>                                  | Me             | Me             | H                                       |
| 13   | CH(Me) <sub>2</sub>                                  | COOEt          | Me             | H                                       |
| 14   | CH <sub>2</sub> -CH <sub>2</sub> -Br                 | H              | H              | H                                       |
| 15   | CH <sub>2</sub> -CH <sub>2</sub> -2-(5-OMe)indole    | H              | H              | H                                       |
| 16   | CH(Me) <sub>2</sub>                                  | Me             | H              | OCH <sub>2</sub> -CH=C(Me) <sub>2</sub> |
| 17   | CH <sub>2</sub> -CH <sub>2</sub> -( <i>o</i> -OMe)Ph | Me             | H              | H                                       |
| 18   | H                                                    | H              | H              | H                                       |

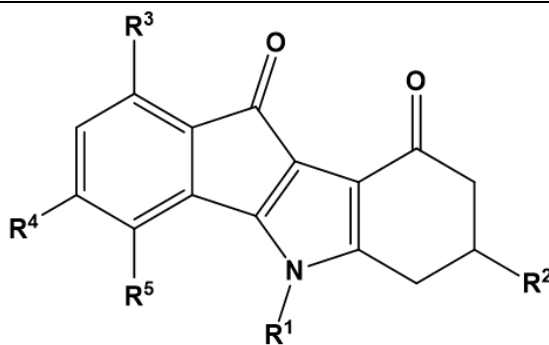

| Name | R <sup>1</sup>                                                                       | R <sup>2</sup>                  | R <sup>3</sup> | R <sup>4</sup> | R <sup>5</sup> | R <sup>6</sup>                         |
|------|--------------------------------------------------------------------------------------|---------------------------------|----------------|----------------|----------------|----------------------------------------|
| 19   | CH(Me) <sub>2</sub>                                                                  | COOH                            | H              | H              | H              | H                                      |
| 20   | CH(Me) <sub>2</sub>                                                                  | COOH                            | Me             | H              | H              | H                                      |
| 21   | CH(Me) <sub>2</sub>                                                                  | Me                              | H              | OMe            | H              | H                                      |
| 22   | CH <sub>2</sub> CH(Me) <sub>2</sub>                                                  | H                               | H              | H              | H              | H                                      |
| 23   | CH <sub>2</sub> CH <sub>2</sub> OMe                                                  | H                               | H              | H              | H              | H                                      |
| 24   | CH <sub>2</sub> CH <sub>2</sub> N(CH <sub>2</sub> C<br>H <sub>3</sub> ) <sub>2</sub> | H                               | H              | H              | H              | H                                      |
| 25   | CH(Me) <sub>2</sub>                                                                  | Me                              | H              | OH             | H              | H                                      |
| 26   | CH(Me) <sub>2</sub>                                                                  | Me                              | H              | H              | H              | OH                                     |
| 27   | CH(Me) <sub>2</sub>                                                                  | Me                              | H              | H              | H              | OCH <sub>2</sub> CH=C(Me) <sub>2</sub> |
| 28   | CH(Me) <sub>2</sub>                                                                  | CH <sub>2</sub> CH <sub>3</sub> | H              | OH             | H              | H                                      |
| 29   | CH(Me) <sub>2</sub>                                                                  | CH <sub>2</sub> CH <sub>3</sub> | H              | H              | H              | OH                                     |
| 30   | CH(Me) <sub>2</sub>                                                                  | CH <sub>2</sub> CH <sub>3</sub> | H              | H              | H              | OCH <sub>2</sub> CH=C(Me) <sub>2</sub> |

|    |                                                     |    |   |                                        |                                                       |                                        |
|----|-----------------------------------------------------|----|---|----------------------------------------|-------------------------------------------------------|----------------------------------------|
| 31 | CH(Me) <sub>2</sub>                                 | H  | H | H                                      | OCH <sub>2</sub> COOH                                 | H                                      |
| 32 | CH(Me) <sub>2</sub>                                 | H  | H | H                                      | OCH <sub>2</sub> CH <sub>2</sub> CH <sub>2</sub> COOH | H                                      |
| 33 | CH <sub>2</sub> CH <sub>2</sub> -( <i>o</i> -OMe)Ph | Me | H | OCH <sub>2</sub> CH=C(Me) <sub>2</sub> | H                                                     | H                                      |
| 34 | CH <sub>2</sub> CH <sub>2</sub> -( <i>o</i> -OMe)Ph | Me | H | H                                      | H                                                     | OCH <sub>2</sub> CH=C(Me) <sub>2</sub> |
| 35 | CH <sub>2</sub> CH <sub>2</sub> Ph                  | Me | H | H                                      | H                                                     | OCH <sub>2</sub> CH=C(Me) <sub>2</sub> |
| 36 | H                                                   | H  | H | H                                      | H                                                     | H                                      |
| 37 | Me                                                  | H  | H | H                                      | H                                                     | H                                      |
| 38 | CH <sub>2</sub> CH <sub>3</sub>                     | H  | H | H                                      | H                                                     | H                                      |

**Table S3.** Phenoxazine- and Phenothiazine-derivatives tested for 8-Fluo-cAMP displacement

| 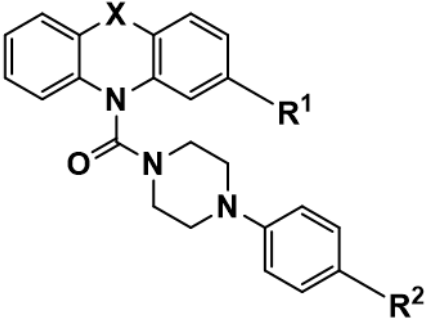 |   |                                       |                 |
|-------------------------------------------------------------------------------------|---|---------------------------------------|-----------------|
| Name                                                                                | X | R <sup>1</sup>                        | R <sup>2</sup>  |
| 39                                                                                  | O | H                                     | H               |
| 40                                                                                  | O | H                                     | Me              |
| 41                                                                                  | O | H                                     | CF <sub>3</sub> |
| 42                                                                                  | O | H                                     | NO <sub>2</sub> |
| 43                                                                                  | O | H                                     | CN              |
| 44                                                                                  | S | Cl                                    | OMe             |
| 45                                                                                  | S | H                                     | OMe             |
| 46                                                                                  | S | H                                     | CN              |
|  |   |                                       |                 |
| Name                                                                                | X | R                                     |                 |
| 47                                                                                  | O | NH-CH <sub>2</sub> ( <i>p</i> -OMe)Ph |                 |
| 48                                                                                  | O | NH-CH <sub>2</sub> ( <i>m</i> -OMe)Ph |                 |
| 49                                                                                  | O | 1-imidazole-4( <i>m</i> -OMe)Ph       |                 |
| 50                                                                                  | S | 1-imidazole-4( <i>m</i> -OMe)Ph       |                 |

**Table S4.** Acridine- derivatives tested for 8-Fluo-cAMP displacement

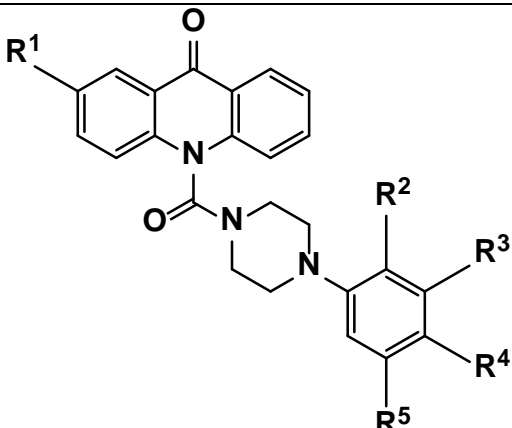

| Name | R <sup>1</sup> | R <sup>2</sup> | R <sup>3</sup> | R <sup>4</sup> | R <sup>5</sup> |
|------|----------------|----------------|----------------|----------------|----------------|
| 51   | H              | H              | H              | OMe            | H              |
| 52   | H              | H              | H              | H              | H              |
| 53   | H              | H              | H              | Cl             | H              |
| 54   | OMe            | OMe            | H              | H              | H              |
| 55   | H              | H              | OMe            | OMe            | OMe            |
| 56   | H              | OMe            | H              | OMe            | H              |
| 57   | H              | H              | H              | Cl             | H              |

**Table S5.** Naphthofuran- and Naphthothiophene- derivatives tested for 8-Fluo-cAMP displacement

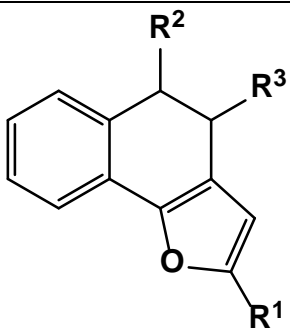

| Name | R <sup>1</sup>                                   | R <sup>2</sup> = R <sup>3</sup> |
|------|--------------------------------------------------|---------------------------------|
| 58   | CH <sub>2</sub> CH <sub>3</sub>                  | =O                              |
| 59   | ( <i>p</i> -OMe)Ph                               | =O                              |
| 60   | 3-pyridine                                       | =O                              |
| 61   | OMe                                              | =O                              |
| 62   | N(CH <sub>2</sub> CH <sub>3</sub> ) <sub>2</sub> | =O                              |
| 62   | N(CH(Me) <sub>2</sub> ) <sub>2</sub>             | OMe                             |
| 64   | NHCH <sub>2</sub> CH <sub>2</sub> OH             | OMe                             |

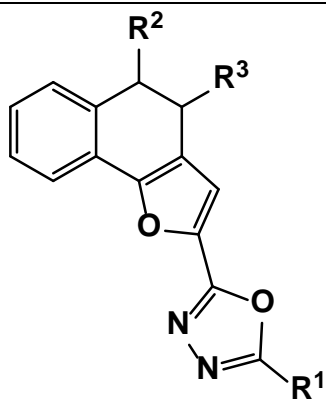

| Name | R <sup>1</sup>                  | R <sup>2</sup> = R <sup>3</sup> |
|------|---------------------------------|---------------------------------|
| 65   | CH <sub>2</sub> CH <sub>3</sub> | OMe                             |
| 66   | CH <sub>2</sub> CH <sub>3</sub> | =O                              |
| 67   | Ph                              | OMe                             |
| 68   | Ph                              | =O                              |

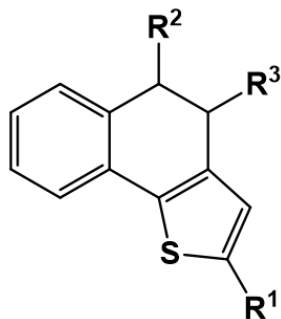

| Name | R <sup>1</sup>                       | R <sup>2</sup> = R <sup>3</sup> |
|------|--------------------------------------|---------------------------------|
| 69   | 2-thiophene                          | =O                              |
| 70   | OMe                                  | =O                              |
| 71   | OCH <sub>2</sub> CH <sub>3</sub>     | =O                              |
| 72   | OPh                                  | =O                              |
| 73   | N(CH(Me) <sub>2</sub> ) <sub>2</sub> | OMe                             |
| 74   | COOH                                 | OMe                             |
| 75   | COOH                                 | =O                              |
| 76   | NHCH <sub>2</sub> CH <sub>2</sub> OH | OMe                             |
